# Supplementary material for: RNA-sequencing reveals the complexities of the transcriptional response to lignocellulosic biofuel substrates in Aspergillus niger
Source: PubMed Central journal article supplement (PMC5598271; doi:10.1186/s40694-014-0003-x), 2014-11-17
Supplement: 40694_2014_3_MOESM2_ESM.pdf [file 40694_2014_3_MOESM2_ESM.pdf]

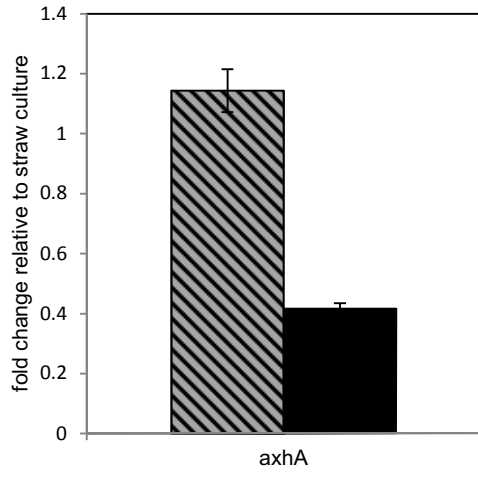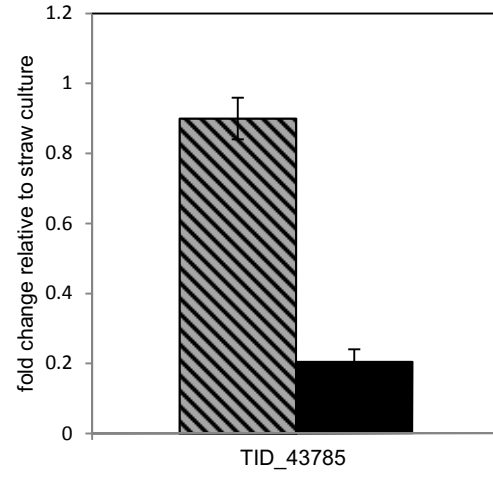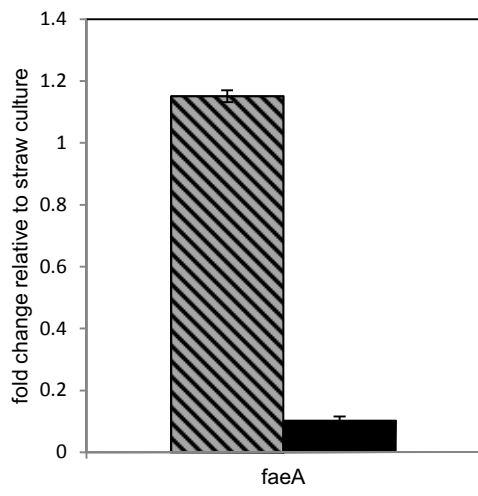

▨ straw cultures  
■ willow cultures
