# Supplementary material for: RNA-sequencing reveals the complexities of the transcriptional response to lignocellulosic biofuel substrates in Aspergillus niger
Source: PubMed Central journal article supplement (PMC5598271; doi:10.1186/s40694-014-0003-x), 2014-11-17

Lane 1 2 3 4 5 6 7

KDa

230

80

60

30

25

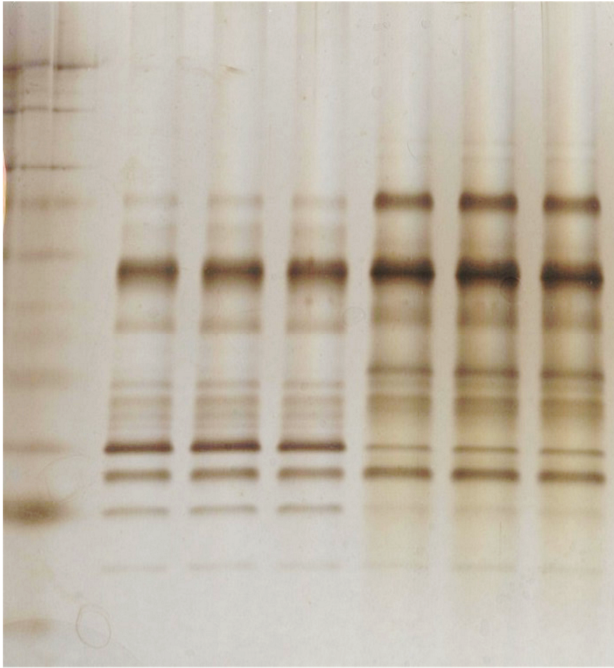

Supplement: 40694_2014_3_MOESM3_ESM.pdf [file 40694_2014_3_MOESM3_ESM.pdf]
