# Supplementary material for: RNA-sequencing reveals the complexities of the transcriptional response to lignocellulosic biofuel substrates in Aspergillus niger
Source: PubMed Central journal article supplement (PMC5598271; doi:10.1186/s40694-014-0003-x), 2014-11-17
Supplement: 40694_2014_3_MOESM6_ESM.pdf [file 40694_2014_3_MOESM6_ESM.pdf]

| Gene name        | ATCC1015 identifier | Primer name   | Sequence (5'-3')          |
|------------------|---------------------|---------------|---------------------------|
| <i>faeA</i>      | TID_51662           | An09g00120_Fw | GCCCAGCTGTCCGCGACATA      |
|                  |                     | An09g00120_Rv | ATGGGCGTAACCCTGCTCCG      |
| <i>axhA</i>      | TID_55136           | An03g00960_Fw | CGATGCTCTCGCCACCCCAA      |
|                  |                     | An03g00960_Rv | AGCGGATGCCATGTCCGACC      |
| <i>TID_43785</i> | TID_43785           | An12g02550_Fw | AATCTCGGGCGCAAGGCAGT      |
|                  |                     | An12g02550_Rv | AAACCCGTCGCGAAGCGAGA      |
| <i>act</i>       | TID_200483          | An15g00560Fw  | TCCTGGGTCTGGAGAGCGGTG     |
|                  |                     | An15g00560Rv  | CTGCATACGGTCGGAGATACCGGG  |
| <i>sarA</i>      | TID_206151          | An01g04040Fw  | GAGGATGAGCTGCGCCACCA      |
|                  |                     | An01g04040Rv  | GACAGCCATCTGATACCTTCACCGT |
